# Supplementary material for: Phosphate ester hydrolysis by yttrium(iii) complexes with Bis-Tris propane and Tris ligands†
Source: Royal Society of Chemistry journal article supplement (doi:10.1039/b103163p), 2001-01-01
Supplement: b103163p.doc [file b103163p.doc]

**Table S1.** Titration data for BTP and yttrium(III) perchlorate mixtures in 0.1 M NaClO4 at 25°C at different **BTP:Y** ratios (initial volume 50 mL); ca. 2 equivalents of HClO4 per 1 mole of BPT were added at the begining of titrations.

| **Point**  **No.** | **mL NaOH added** | **pH** | | | | |
| --- | --- | --- | --- | --- | --- | --- |
| 10 mM BTP**a** and 10 mM Y(III)  [NaOH]=0.105M | 20 mM BTP**a**and 10 mM Y(III)  [NaOH]=0.105M | 5 mM BTP**a** and 5 mM Y(III)  [NaOH]=0.118M | 10 mM BTP**b** and:5 mM Y(III)  [NaOH]=0.204M | 5 mM BTP**c** and 10 mM Y(III)  [NaOH]=0.197M |
| 1 | 0.00 | 3.2776 | 2.9976 | 3.5974 | 2.7981 | 3.1161 |
| 2 | 0.10 | 3.6616 | ----- | 4.4654 | ----- | 3.6501 |
| 3 | 0.15 | ----- | ----- | ----- | ----- | 4.6301 |
| 4 | 0.20 | 4.6256 | 3.2926 | 5.5164 | 3.1131 | 5.2721 |
| 5 | 0.25 | ----- | ----- | ----- | ----- | 5.5451 |
| 6 | 0.30 | 5.1736 | ----- | 5.8624 | ----- | 5.7231 |
| 7 | 0.35 | ----- | ----- | ----- | ----- | 5.8571 |
| 8 | 0.40 | 5.4376 | 4.1896 | 6.0744 | 4.7831 | 5.9671 |
| 9 | 0.45 | ----- | ----- | ----- | ----- | 6.0611 |
| 10 | 0.50 | 5.6106 | ----- | 6.2284 | ----- | 6.1441 |
| 11 | 0.55 | ----- | ----- | ----- | ----- | 6.2191 |
| 12 | 0.60 | 5.7436 | 5.1446 | 6.3534 | 5.7431 | 6.2871 |
| 13 | 0.70 | 5.8486 | ----- | 6.4634 | ----- | 6.4081 |
| 14 | 0.80 | 5.9376 | 5.4646 | 6.5584 | 6.0481 | 6.5141 |
| 15 | 0.90 | 6.0146 | ----- | 6.6444 | ----- | 6.6001 |
| 16 | 1.00 | 6.0846 | 5.6566 | 6.7254 | 6.2501 | 6.6681 |
| 17 | 1.10 | 6.1466 | ----- | ----- | ----- | 6.7181 |
| 18 | 1.20 | 6.2046 | 5.7936 | 6.8064 | 6.4061 | 6.7591 |
| 19 | 1.30 | 6.2576 | ----- | ----- | ----- | 6.7901 |
| 20 | 1.40 | 6.3076 | 5.9016 | 7.0044 | 6.5391 | 6.8211 |
| 21 | 1.50 | 6.3536 | ----- | ----- | ----- | 6.8471 |
| 22 | 1.60 | 6.3976 | 5.9886 | 7.1174 | 6.6551 | 6.8681 |
| 23 | 1.70 | 6.4396 | ----- | ----- | ----- | 6.8881 |
| 24 | 1.80 | 6.4806 | 6.0676 | 7.2014 | 6.7611 | 6.9071 |
| 25 | 1.90 | 6.5176 | ----- | ----- | ----- | 6.9251 |
| 26 | 2.00 | 6.5536 | 6.1366 | 7.2654 | 6.8561 | 6.9411 |
| 27 | 2.10 | 6.5896 | ----- | ----- | ----- | 6.9551 |
| 28 | 2.20 | 6.6236 | 6.1976 | 7.3154 | 6.9391 | 6.9691 |
| 29 | 2.30 | 6.6566 | ----- | ----- | ----- | 6.9831 |
| 30 | 2.40 | 6.6886 | 6.2546 | 7.3574 | 7.0091 | 6.9971 |
| 31 | 2.50 | 6.7186 | ----- | ----- | ----- | 7.0081 |
| 32 | 2.60 | 6.7486 | 6.3076 | 7.3954 | 7.0691 | 7.0221 |
| 33 | 2.70 | 6.7746 | ----- | ----- | ----- | 7.0331 |
| 34 | 2.80 | 6.8006 | 6.3536 | 7.4284 | 7.1191 | 7.0421 |
| 35 | 2.90 | 6.8246 | ----- | ----- | ----- | 7.0541 |
| 36 | 3.00 | 6.8466 | 6.4106 | 7.4594 | 7.1671 | 7.0651 |
| 37 | 3.10 | 6.8676 | ----- | ----- | ----- | 7.0731 |
| 38 | 3.20 | 6.8876 | 6.4426 | 7.4874 | 7.2111 |  |
| 39 | 3.30 | 6.9046 | ----- | ----- | ----- |  |
| 40 | 3.40 | 6.9226 | 6.4836 | 7.5144 | 7.2531 |  |
| 41 | 3.50 | 6.9386 | ----- | ----- | ----- |  |
| 42 | 3.60 | 6.9526 | 6.5226 | 7.5404 | 7.2931 |  |
| 43 | 3.70 | 6.9666 | ----- | ----- | ----- |  |
| 44 | 3.80 | 6.9806 | 6.5606 | 7.5674 | 7.3351 |  |
| 45 | 3.90 | 6.9926 | ----- | ----- | ----- |  |
| 46 | 4.00 | 7.0056 | 6.5966 | 7.5924 | 7.3721 |  |
| 47 | 4.10 | 7.0176 | ----- | ----- | ----- |  |
| 48 | 4.20 | 7.0286 | 6.6326 | 7.6174 | 7.4141 |  |
| 49 | 4.30 | 7.0386 | ----- | ----- | ----- |  |
| 50 | 4.40 | 7.0496 | 6.6656 | 7.6414 | 7.4571 |  |
| 51 | 4.50 | 7.0596 | ----- | ----- | ----- |  |
| 52 | 4.60 | 7.0706 | 6.6976 | 7.6664 | 7.5021 |  |
| 53 | 4.70 | 7.0796 | ----- | ----- | ----- |  |
| 54 | 4.80 | 7.0896 | 6.7286 | 7.6914 | 7.5511 |  |
| 55 | 4.90 | 7.0986 | ----- | ----- | ----- |  |
| 56 | 5.00 | 7.1076 | 6.7576 | 7.7164 | 7.6081 |  |
| 57 | 5.10 | 7.1166 | ----- | ----- | ----- |  |
| 58 | 5.20 | 7.1236 | 6.7846 | 7.7414 | 7.6691 |  |
| 59 | 5.30 | 7.1396 | ----- | ----- | ----- |  |
| 60 | 5.40 | 7.1466 | 6.8126 | 7.7414 | 7.7401 |  |
| 61 | 5.50 | 7.1536 | ----- | ----- | ----- |  |
| 62 | 5.60 | 7.1626 | 6.8376 | 7.7414 | 7.8271 |  |
| 63 | 5.70 | 7.1676 | ----- | ----- | ----- |  |
| 64 | 5.80 | 7.1746 | 6.8586 | 7.7414 | 7.9271 |  |
| 65 | 5.90 | 7.1816 | ----- | ----- | ----- |  |
| 66 | 6.00 | 7.1886 | 6.8806 | 7.7434 | 8.0311 |  |
| 67 | 6.10 | 7.1956 | ----- | ----- | ----- |  |
| 68 | 6.20 | 7.2026 | 6.9026 | 7.7624 | 8.1261 |  |
| 69 | 6.30 | 7.2076 | ----- | ----- | ----- |  |
| 70 | 6.40 | 7.2156 | 6.9206 | 7.8064 | 8.2131 |  |
| 71 | 6.50 | 7.2226 | ----- | ----- | ----- |  |
| 72 | 6.60 | 7.2276 | 6.9396 | 7.8104 | 8.3371 |  |
| 73 | 6.70 | 7.2326 | ----- | ----- | ----- |  |
| 74 | 6.80 | 7.2396 | 6.9556 | 7.8554 | 8.4471 |  |
| 75 | 6.90 | 7.2456 | ----- | ----- | ----- |  |
| 76 | 7.00 | 7.2526 | 6.9736 | 7.8994 | 8.5701 |  |
| 77 | 7.10 | 7.2576 | ----- | ----- | ----- |  |
| 78 | 7.20 | 7.2646 | 6.9916 | 7.9514 | 8.6961 |  |
| 79 | 7.30 | 7.2696 | ----- | ----- | ----- |  |
| 80 | 7.40 | 7.2766 | 7.0066 | 8.0184 | 8.8401 |  |
| 81 | 7.50 | 7.2826 | ----- | ----- | ----- |  |
| 82 | 7.60 | 7.2876 | 7.0226 | 8.1014 | 8.9381 |  |
| 83 | 7.70 | 7.2926 | ----- | ----- | ----- |  |
| 84 | 7.80 | 7.2996 | 7.0366 | 8.1964 | 9.0611 |  |
| 85 | 7.90 | 7.3066 | ----- | ----- | ----- |  |
| 86 | 8.00 | 7.3126 | 7.0526 | 8.3344 | 9.1801 |  |
| 87 | 8.10 | 7.3176 | ----- | ----- | ----- |  |
| 88 | 8.20 | 7.3226 | 7.0686 | 8.4804 | 9.3021 |  |
| 89 | 8.30 | 7.3296 | ----- | ----- | ----- |  |
| 90 | 8.40 | 7.3346 | 7.0826 | 8.6334 | 9.4471 |  |
| 91 | 8.50 | 7.3406 | ----- | ----- | ----- |  |
| 92 | 8.60 | 7.3476 | 7.0966 | 8.7784 | 9.6161 |  |
| 93 | 8.70 | 7.3526 | ----- | ----- | ----- |  |
| 94 | 8.80 | 7.3576 | 7.1096 | 8.9154 | 9.8231 |  |
| 95 | 8.90 | 7.3636 | ----- | ----- | ----- |  |
| 96 | 9.00 | 7.3686 | 7.1236 | 9.0544 | 10.0951 |  |
| 97 | 9.10 | 7.3756 | ----- | ----- |  |  |
| 98 | 9.20 | 7.3806 | 7.1356 | 9.1924 |  |  |
| 99 | 9.30 | 7.3866 | ----- | ----- |  |  |
| 100 | 9.40 | 7.3936 | 7.1486 | 9.3364 |  |  |
| 101 | 9.50 | 7.3986 | ----- | ----- |  |  |
| 102 | 9.60 | 7.4036 | 7.1606 | 9.4904 |  |  |
| 103 | 9.70 | 7.4096 | ----- | ----- |  |  |
| 104 | 9.80 | 7.4146 | ----- | 9.6604 |  |  |
| 105 | 9.90 | 7.4176 | ----- | ----- |  |  |
| 106 | 10.00 | 7.4226 | 7.1836 | 9.8524 |  |  |
| 107 | 10.10 | 7.4286 | ----- | ----- |  |  |
| 108 | 10.20 | 7.4336 | 7.1956 | 10.0794 |  |  |
| 109 | 10.30 | 7.4386 | ----- | ----- |  |  |
| 110 | 10.40 | 7.4456 | 7.2076 | 10.3274 |  |  |
| 111 | 10.50 | 7.4476 | ----- |  |  |  |
| 112 | 10.60 | 7.4536 | 7.2166 |  |  |  |
| 113 | 10.70 | 7.4606 | ----- |  |  |  |
| 114 | 10.80 | 7.4636 | 7.2276 |  |  |  |
| 115 | 10.90 | 7.4686 | ----- |  |  |  |
| 116 | 11.00 | 7.4746 | 7.2396 |  |  |  |
| 117 | 11.10 | 7.4866 | ----- |  |  |  |
| 118 | 11.20 | 7.4916 | 7.2506 |  |  |  |
| 119 | 11.30 | 7.4956 | ----- |  |  |  |
| 120 | 11.40 | 7.5006 | 7.2606 |  |  |  |
| 121 | 11.50 | 7.5006 | ----- |  |  |  |
| 122 | 11.60 | 7.5066 | 7.2716 |  |  |  |
| 123 | 11.70 | 7.5096 | ----- |  |  |  |
| 124 | 11.80 | 7.5116 | 7.2826 |  |  |  |
| 125 | 11.90 | 7.5146 | ----- |  |  |  |
| 126 | 12.00 | 7.5186 | 7.2946 |  |  |  |
| 127 | 12.10 | 7.5206 | ----- |  |  |  |
| 128 | 12.20 | 7.5236 | 7.3036 |  |  |  |
| 129 | 12.30 | 7.5286 | ----- |  |  |  |
| 130 | 12.40 | 7.5306 | 7.3136 |  |  |  |
| 131 | 12.50 | 7.5326 | ----- |  |  |  |
| 132 | 12.60 | 7.5376 | 7.3246 |  |  |  |
| 133 | 12.70 | 7.5416 | ----- |  |  |  |
| 134 | 12.80 | 7.5486 | 7.3366 |  |  |  |
| 135 | 12.90 | ----- | ----- |  |  |  |
| 136 | 13.00 | 7.5646 | 7.3476 |  |  |  |
| 137 | 13.20 | 7.5816 | 7.3596 |  |  |  |
| 138 | 13.40 | 7.5946 | 7.3706 |  |  |  |
| 139 | 13.60 | 7.6026 | 7.3826 |  |  |  |
| 140 | 13.80 | 7.6206 | 7.3936 |  |  |  |
| 141 | 14.00 | 7.6346 | 7.4036 |  |  |  |
| 142 | 14.20 | 7.6436 | 7.4166 |  |  |  |
| 143 | 14.40 | ----- | 7.4286 |  |  |  |
| 144 | 14.60 | 7.6676 | 7.4406 |  |  |  |
| 145 | 14.80 | 7.6876 | 7.4536 |  |  |  |
| 146 | 15.00 | 7.7036 | 7.4656 |  |  |  |
| 147 | 15.20 | 7.7246 | 7.4796 |  |  |  |
| 148 | 15.40 | 7.7576 | 7.4916 |  |  |  |
| 149 | 15.60 | 7.7826 | 7.5056 |  |  |  |
| 150 | 15.80 | 7.8146 | 7.5206 |  |  |  |
| 151 | 16.00 | 7.8456 | 7.5336 |  |  |  |
| 152 | 16.20 | 7.8836 | 7.5486 |  |  |  |
| 153 | 16.40 | 7.9276 | 7.5636 |  |  |  |
| 154 | 16.60 | 7.9726 | 7.5796 |  |  |  |
| 155 | 16.80 | 8.0316 | 7.5976 |  |  |  |
| 156 | 17.00 | 8.0836 | 7.6136 |  |  |  |
| 157 | 17.20 | 8.1496 | 7.6306 |  |  |  |
| 158 | 17.40 | 8.2186 | 7.6506 |  |  |  |
| 159 | 17.60 | 8.2866 | 7.6696 |  |  |  |
| 160 | 17.80 | 8.3546 | 7.6896 |  |  |  |
| 161 | 18.00 | 8.4266 | 7.7106 |  |  |  |
| 162 | 18.20 | 8.4936 | 7.7316 |  |  |  |
| 163 | 18.40 | 8.5616 | 7.7546 |  |  |  |
| 164 | 18.60 | 8.6286 | 7.7776 |  |  |  |
| 165 | 18.80 | 8.6936 | 7.8016 |  |  |  |
| 166 | 19.00 | 8.7556 | 7.8286 |  |  |  |
| 167 | 19.20 | 8.8186 | 7.8526 |  |  |  |
| 168 | 19.40 | 8.8806 | 7.8786 |  |  |  |
| 169 | 19.60 | 8.9416 | 7.9046 |  |  |  |
| 170 | 19.80 | 9.0066 | 7.9276 |  |  |  |
| 171 | 20.00 | 9.0686 | 7.9536 |  |  |  |
| 172 | 20.20 | 9.1336 | 7.9766 |  |  |  |
| 173 | 20.40 | 9.1986 | 7.9976 |  |  |  |
| 174 | 20.60 | 9.2676 | 8.0246 |  |  |  |
| 175 | 20.80 | 9.3386 | 8.0506 |  |  |  |
| 176 | 21.00 | 9.4136 | 8.0696 |  |  |  |
| 177 | 21.20 | 9.4916 | 8.0896 |  |  |  |
| 178 | 21.40 | 9.5696 | 8.1056 |  |  |  |
| 178 | 21.60 | 9.6636 | 8.1356 |  |  |  |
| 180 | 21.80 |  | 8.1586 |  |  |  |
| 181 | 22.0 |  | 8.1876 |  |  |  |
| 182 | 22.2 |  | 8.2196 |  |  |  |
| 183 | 22.4 |  | 8.2536 |  |  |  |
| 184 | 22.6 |  | 8.2816 |  |  |  |
| 185 | 22.8 |  | 8.3166 |  |  |  |
| 186 | 23.0 |  | 8.3516 |  |  |  |
| 187 | 23.2 |  | 8.3816 |  |  |  |
| 188 | 23.4 |  | 8.4186 |  |  |  |
| 189 | 23.6 |  | 8.4546 |  |  |  |
| 190 | 23.8 |  | 8.4896 |  |  |  |
| 191 | 24.0 |  | 8.5266 |  |  |  |
| 192 | 24.2 |  | 8.5616 |  |  |  |
| 193 | 24.4 |  | 8.5966 |  |  |  |
| 194 | 24.6 |  | 8.6286 |  |  |  |
| 195 | 24.8 |  | 8.6656 |  |  |  |
| 196 | 25.0 |  | 8.7006 |  |  |  |
| 197 | 25.2 |  | 8.7346 |  |  |  |
| 198 | 25.4 |  | 8.7676 |  |  |  |
| 199 | 25.6 |  | 8.8016 |  |  |  |
| 200 | 25.8 |  | 8.8346 |  |  |  |
| 201 | 26.0 |  | 8.8666 |  |  |  |
| 202 | 26.2 |  | 8.9006 |  |  |  |
| 203 | 26.4 |  | 8.9316 |  |  |  |
| 205 | 26.6 |  | 8.9636 |  |  |  |
| 206 | 26.8 |  | 8.9956 |  |  |  |
| 207 | 27.0 |  | 9.0286 |  |  |  |
| 208 | 27.2 |  | 9.0606 |  |  |  |
| 209 | 27.4 |  | 9.0926 |  |  |  |
| 210 | 27.6 |  | 9.1256 |  |  |  |
| 211 | 27.8 |  | 9.1596 |  |  |  |
| 212 | 28.0 |  | 9.1966 |  |  |  |
| 213 | 28.2 |  | 9.2296 |  |  |  |
| 214 | 28.4 |  | 9.2656 |  |  |  |
| 215 | 28.6 |  | 9.3026 |  |  |  |
| 216 | 28.8 |  | 9.3396 |  |  |  |
| 217 | 29.0 |  | 9.3776 |  |  |  |
| 218 | 29.2 |  | 9.4186 |  |  |  |
| 219 | 29.4 |  | 9.4606 |  |  |  |
| 220 | 29.6 |  | 9.5026 |  |  |  |
| 221 | 29.8 |  | 9.5506 |  |  |  |
| 222 | 30.0 |  | 9.5966 |  |  |  |
| 223 | 30.2 |  | 9.6496 |  |  |  |
| 224 | 30.4 |  | 9.7026 |  |  |  |
| 225 | 30.6 |  | 9.7566 |  |  |  |
| 226 | 30.8 |  | 9.8166 |  |  |  |
| 227 | 31.0 |  | 9.8816 |  |  |  |
| 228 | 31.2 |  | 9.9506 |  |  |  |
| 229 | 31.4 |  | 10.0216 |  |  |  |
| 230 | 31.6 |  | 10.0986 |  |  |  |
| 231 | 31.8 |  | 10.1906 |  |  |  |
| 232 | 32.0 |  | 10.2926 |  |  |  |

a 2.04 equivalents of HClO4 were added

b 2.14 equivalents of HClO4 were added.

c 2.14 equivalents of HClO4 were added.

**Figures S1a-e.** Fitting (solid lines) of the titration data to the model given in Scheme 2 and a set of stability constants given in Table S2, *a* – number of equivalents of NaOH added per Y(III).

Fig.S1a: 5 mM BTP and 5 mM Y(III)

Fig.S1b: 5 mM BTP and 10 mM Y(III)

Fig.S1c: 10 mM BTP and:5 mM Y(III)

Fig.S1d: 10 mM BTP and 10 mM Y(III)

FigS1e: 20 mM BTP and 10 mM Y(III)

**Table S2.** Stability constants (logK) determined by the fitting of titrations curves at different total concentrations of metal and ligand to the model shown in Scheme 2. Composition of the complexes is written as YnHpBTPq

| Species  n p q | BTP:Y  5:10 | BTP:Y  5:5 | BTP:Y  10:5 | BTP:Y  10:10 | BTP:Y  20:10 |
| --- | --- | --- | --- | --- | --- |
| 1 0 1 | 3.98 | 3.70 | ------*a* | 2.98 | ----- *a* |
| 2 -2 1 | ----- *a* | ----- *a* | -8.56 | -9.39 | -8.82 |
| 2 -4 1 | -22.00 | -24.00 | -23.35 | -23.64 | -24.18 |
| 2 -5 1 | ----- *a* | -32.27 | -32.08 | -32.30 | -33.06 |
| 2 -6 1 | ----- *a* | -42.22 | -40.34 | -42.38 | -43.15 |

a Refinement with Hyperquad gave a negative constant, which was excluded from the fitting curve.

**Table S3** Titration data for Tris and yttrium(III) perchlorate mixtures in 0.1 M NaClO4 at 25°C at different **Tris:Y** ratios (initial volume 50 mL); 1.016, 0.905 and 1.06 equivalents of HClO4 per 1 equivalent of Tris were added at the begining of titations with 10, 46.6 and 20 mM Tris respectively.

| **Point**  **No.** | 10.0 mM Tris and 5 mM Y(III)  [NaOH]=0.197 M | | 46.6 mM Tris and 5 mM Y(III)  [NaOH]=0.207 M | | 20.0 mM Tris and 5 mM Y(III)  [NaOH]=0.204 M | |
| --- | --- | --- | --- | --- | --- | --- |
| **mL NaOH added** | **pH** | **mL NaOH added** | **pH** | **mL NaOH added** | **pH** |
| 1 | 0.00 | 4.0672 | 0.0 | 6.6278 | 0.0 | 2.8331 |
| 2 | 0.05 | 5.9902 | 0.1 | 6.6728 | 0.2 | 3.2811 |
| 3 | 0.10 | 6.4122 | 0.2 | 6.7148 | 0.4 | 6.0951 |
| 4 | 0.15 | 6.6252 | 0.3 | 6.7558 | 0.6 | 6.6421 |
| 5 | 0.20 | 6.7612 | 0.4 | 6.7908 | 0.8 | 6.8601 |
| 6 | 0.25 | 6.8632 | 0.5 | 6.8238 | 1.0 | 6.9971 |
| 7 | 0.30 | 6.9372 | 0.6 | 6.8538 | 1.2 | 7.0901 |
| 8 | 0.35 | 6.9932 | 0.7 | 6.8818 | 1.4 | 7.1581 |
| 9 | 0.40 | 7.0382 | 0.8 | 6.9068 | 1.6 | 7.2111 |
| 10 | 0.45 | 7.0722 | 0.9 | 6.9308 | 1.8 | 7.2561 |
| 11 | 0.50 | 7.1022 | 1.0 | 6.9518 | 2.0 | 7.2951 |
| 12 | 0.55 | 7.1282 | 1.1 | 6.9748 | 2.2 | 7.3321 |
| 13 | 0.60 | 7.1492 | 1.2 | 6.9928 | 2.4 | 7.3651 |
| 14 | 0.65 | 7.1712 | 1.3 | 7.0118 | 2.6 | 7.3951 |
| 15 | 0.70 | 7.1892 | 1.4 | 7.0298 | 2.8 | 7.4291 |
| 16 | 0.75 | 7.2072 | 1.5 | 7.0468 | 3.0 | 7.4551 |
| 17 | 0.80 | 7.2232 | 1.6 | 7.0628 | 3.2 | 7.4831 |
| 18 | 0.85 | 7.2372 | 1.7 | 7.0768 | 3.4 | 7.5081 |
| 19 | 0.90 | 7.2502 | 1.8 | 7.0928 | 3.6 | 7.5361 |
| 20 | 0.95 | 7.2632 | 1.9 | 7.1068 | 3.8 | 7.5451 |
| 21 | 1.00 | 7.2752 | 2.0 | 7.1208 | 4.0 | 7.5651 |
| 22 | 1.05 | 7.2822 | 2.1 | 7.1368 | 5.0 | 7.7041 |
| 23 | 1.10 | 7.2932 | 2.2 | 7.1468 |  |  |
| 24 | 1.15 | 7.3022 | 2.3 | 7.1608 |  |  |
| 25 | 1.20 | 7.3112 | 2.4 | 7.1718 |  |  |
| 26 | 1.25 | 7.3202 | 2.5 | 7.1838 |  |  |
| 27 | 1.30 | 7.3292 | 2.6 | 7.1948 |  |  |
| 28 | 1.35 | 7.3382 | 2.7 | 7.2068 |  |  |
| 29 | 1.40 | 7.3452 | 2.8 | 7.2188 |  |  |
| 30 | 1.45 | 7.3542 | 2.9 | 7.2278 |  |  |
| 31 | 1.50 | 7.3632 | 3.0 | 7.2398 |  |  |
| 32 | 1.55 | 7.3702 | 3.1 | 7.2488 |  |  |
| 33 | 1.60 | 7.3772 | 3.2 | 7.2598 |  |  |
| 34 | 1.65 | 7.3832 | 3.3 | 7.2678 |  |  |
| 35 | 1.70 | 7.3862 | 3.4 | 7.2788 |  |  |
| 36 | 1.75 | 7.3922 | 3.5 | 7.2878 |  |  |
| 37 | 1.80 | 7.3652 | 3.6 | 7.2948 |  |  |
| 38 | 1.85 | 7.3992 | 3.7 | 7.3068 |  |  |
| 39 | 1.90 | 7.4042 | 3.8 | 7.3118 |  |  |
| 40 | 1.95 | 7.4102 | 3.9 | 7.3188 |  |  |
| 41 | 2.00 | 7.4122 | 4.0 | 7.3278 |  |  |
| 42 | 2.10 | 7.4262 | 4.1 | 7.3348 |  |  |
| 43 | 2.20 | 7.4332 | 4.2 | 7.3438 |  |  |
| 44 |  |  | 4.3 | 7.3508 |  |  |
| 45 |  |  | 4.4 | 7.3598 |  |  |
| 46 |  |  | 4.5 | 7.3678 |  |  |
| 47 |  |  | 4.6 | 7.3768 |  |  |
| 48 |  |  | 4.7 | 7.3878 |  |  |
| 49 |  |  | 4.8 | 7.3968 |  |  |
| 50 |  |  | 4.9 | 7.4068 |  |  |
| 51 |  |  | 5.0 | 7.4178 |  |  |
| 52 |  |  | 5.1 | 7.4258 |  |  |
| 53 |  |  | 5.2 | 7.4398 |  |  |
| 54 |  |  | 5.3 | 7.4468 |  |  |
| 55 |  |  | 5.4 | 7.4578 |  |  |
| 56 |  |  | 5.5 | 7.4678 |  |  |
| 57 |  |  | 5.6 | 7.4788 |  |  |
| 58 |  |  | 5.7 | 7.4908 |  |  |
| 59 |  |  | 5.8 | 7.5038 |  |  |
| 60 |  |  | 5.9 | 7.5138 |  |  |
| 61 |  |  | 6.0 | 7.5258 |  |  |
| 62 |  |  | 6.1 | 7.5368 |  |  |
| 63 |  |  | 6.2 | 7.5488 |  |  |
| 64 |  |  | 6.3 | 7.5628 |  |  |
| 65 |  |  | 6.4 | 7.5738 |  |  |
| 66 |  |  | 6.5 | 7.5878 |  |  |
| 67 |  |  | 6.6 | 7.5998 |  |  |
| 68 |  |  | 6.7 | 7.6138 |  |  |
| 69 |  |  | 6.8 | 7.6258 |  |  |
| 70 |  |  | 6.9 | 7.6408 |  |  |
| 71 |  |  | 7.0 | 7.6528 |  |  |
| 72 |  |  | 7.1 | 7.6648 |  |  |
| 73 |  |  | 7.2 | 7.6768 |  |  |
| 74 |  |  | 7.3 | 7.6928 |  |  |
| 75 |  |  | 7.4 | 7.7058 |  |  |
| 76 |  |  | 7.5 | 7.7178 |  |  |
| 77 |  |  | 7.6 | 7.7318 |  |  |
| 78 |  |  | 7.7 | 7.7458 |  |  |
| 79 |  |  | 7.8 | 7.7598 |  |  |
| 80 |  |  | 7.9 | 7.7738 |  |  |
| 81 |  |  | 8.0 | 7.7878 |  |  |
| 82 |  |  | 8.1 | 7.8018 |  |  |
| 83 |  |  | 8.2 | 7.8158 |  |  |
| 84 |  |  | 8.3 | 7.8278 |  |  |
| 85 |  |  | 8.4 | 7.8438 |  |  |
| 86 |  |  | 8.5 | 7.8568 |  |  |
| 87 |  |  | 8.6 | 7.8728 |  |  |
| 88 |  |  | 8.7 | 7.8848 |  |  |
| 89 |  |  | 8.8 | 7.8998 |  |  |
| 90 |  |  | 8.9 | 7.9138 |  |  |
| 91 |  |  | 9.0 | 7.9298 |  |  |
| 92 |  |  | 9.1 | 7.9438 |  |  |
| 93 |  |  | 9.2 | 7.9598 |  |  |
| 94 |  |  | 9.3 | 7.9758 |  |  |
| 95 |  |  | 9.4 | 7.9898 |  |  |
| 96 |  |  | 9.5 | 8.0038 |  |  |
| 97 |  |  | 9.6 | 8.0198 |  |  |
| 98 |  |  | 9.7 | 8.0358 |  |  |
| 99 |  |  | 9.8 | 8.0508 |  |  |
| 100 |  |  | 9.9 | 8.0668 |  |  |
| 101 |  |  | 10.0 | 8.0828 |  |  |
| 102 |  |  | 10.1 | 8.0988 |  |  |
| 103 |  |  | 10.2 | 8.1158 |  |  |
| 104 |  |  | 10.3 | 8.1318 |  |  |
| 105 |  |  | 10.4 | 8.1608 |  |  |
| 106 |  |  | 10.5 | 8.1648 |  |  |
| 107 |  |  | 10.6 | 8.1828 |  |  |
| 108 |  |  | 10.7 | 8.2018 |  |  |
| 109 |  |  | 10.8 | 8.2178 |  |  |
| 110 |  |  | 10.9 | 8.2368 |  |  |
| 111 |  |  | 11.0 | 8.2568 |  |  |
| 112 |  |  | 11.1 | 8.2758 |  |  |
| 113 |  |  | 11.2 | 8.2928 |  |  |
| 114 |  |  | 11.3 | 8.3118 |  |  |
| 115 |  |  | 11.4 | 8.3328 |  |  |
| 116 |  |  | 11.5 | 8.3548 |  |  |
| 117 |  |  | 11.6 | 8.3758 |  |  |
| 118 |  |  | 11.7 | 8.3968 |  |  |
| 119 |  |  | 11.8 | 8.4158 |  |  |
| 120 |  |  | 11.9 | 8.4388 |  |  |
| 121 |  |  | 12.0 | 8.4628 |  |  |
| 122 |  |  | 12.1 | 8.4858 |  |  |
| 123 |  |  | 12.2 | 8.5068 |  |  |
| 124 |  |  | 12.3 | 8.5338 |  |  |
| 125 |  |  | 12.4 | 8.5628 |  |  |
| 126 |  |  | 12.5 | 8.5898 |  |  |
| 127 |  |  | 12.6 | 8.6208 |  |  |
| 128 |  |  | 12.7 | 8.6528 |  |  |
| 129 |  |  | 12.8 | 8.6858 |  |  |
| 130 |  |  | 12.9 | 8.7198 |  |  |
| 131 |  |  | 13.0 | 8.7558 |  |  |
| 132 |  |  | 13.1 | 8.7938 |  |  |
| 133 |  |  | 13.2 | 8.8328 |  |  |
| 134 |  |  | 13.3 | 8.8768 |  |  |
| 135 |  |  | 13.4 | 8.9188 |  |  |
| 136 |  |  | 13.5 | 8.9728 |  |  |
| 137 |  |  | 13.6 | 9.0298 |  |  |
| 138 |  |  | 13.7 | 9.0918 |  |  |
| 139 |  |  | 13.8 | 9.1598 |  |  |
| 140 |  |  | 13.9 | 9.2438 |  |  |
| 141 |  |  | 14.0 | 9.3388 |  |  |
| 143 |  |  | 14.1 | 9.4558 |  |  |
| 144 |  |  | 14.2 | 9.5798 |  |  |
| 145 |  |  | 14.3 | 9.6868 |  |  |
| 146 |  |  | 14.4 | 9.7808 |  |  |

FigS2a: 10 mM Tris and 5 mM Y(III)

FigS2b: 47 mM Tris and 5 mM Y(III)

FigS2c: 20 mM Tris and 5 mM Y(III)

**Table S4.** Stability constants (logK) determined by the fitting of titrations curves at different total concentrations of metal and ligand to the model shown in Scheme 2. Composition of the complexes is written as YnHpTrisq

| Species  n p q | Tris:Y  10:5 | Tris:Y  46.6:5 | Tris:Y  20:5 |
| --- | --- | --- | --- |
| 1 0 1 | 2.06 | 2.54 | 2.09 |
| 2 -5 2 | -29.45 | -28.73 | -30.01 |
| 2 -7 2 | - *a* | -44.45 *b* | - *a* |

a Refinement with Hyperquad gave a negative constant, which was excluded from the fitting curve.

b Only fitting of this titration curve with very large excess of Tris required the complex Y2H-7Tris2. Since ca. 90% of added NaOH was consumed in this case for titration of Tris an this complex was not required for fitting of other titrations with lower ligand/metal ratios we did no include it in the species distribution diagrams used for the analysis of kinetic results.
